# Supplementary material for: The impacts of space mutation and host genotype on endophyte role in host perennial ryegrass stress tolerance
Source: Research Square preprint supplement (doi:10.21203/rs.3.rs-334947/v1), 2021-04-06
Supplement: Supplementary file 1 [file 88e4f5c5be1a59cb25cdfc55.xlsx]

## Sheet: Sheet1
Treatments	df	Plant height		Tiller number		Aboveground biomass		Underground biomass		IAA		ABA		CTK		GA		SA		Aboveground total carbon		Underground total carbon		Aboveground total nitrogen		Underground total nitrogen		Aboveground total phosphorus		Underground total phosphorus		Aboveground total Na+		Underground total Na+		Aboveground total K+		Underground total K+		Aboveground total Ca2+		Underground total Ca2+
		F	P	F	P	F	P	F	P	F	P	F	P	F	P	F	P	F	P	F	P			F	P	F	P	F	P	F	P	F	P	F	P	F	P	F	P	F	P	F	P
Stress (S)	3	25.249	0	3.69532	0.0571054	70.1937	1.65149e-14	11.5508	0.000938762	0.30265	0.583321	0.0814021	0.775933	1.58102	0.211229	2.9351	0.0894399	5.70016	0.0186377	151.522	1.32598e-22	0.0497664	0.823877	1.45137	0.230848	1.2519	0.265584	225.144	1.44784e-28	2.00069	0.160002	2459.93	4.65123e-78	0.0793744	0.778667	1.37944	0.242688	7.35241	0.00775326	6.24335	0.0139173	2.20515	0.140359
Host genotype (H)	1	2.451	0.12	73.864	5.65479e-14	17.808	3.90746e-05	14.7028	0.000208403	0.0150232	0.902668	2.0619	0.153809	0.420687	0.517922	7.144	0.00864508	2.36819	0.126651	2.34301	0.128641	0.313613	0.57659	33.6498	6.21579e-08	17.5836	5.51938e-05	2.22145	0.138916	13.8653	0.000309132	53.8971	3.61532e-11	6.06586	0.0153042	6.57774	0.0116492	6.87887	0.00993616	0.0311517	0.860221	1.58405	0.210795
Space mutation (SP)	1	0.007	0.933	6.03576	0.0155534	7.08476	0.00849402	29.1967	3.72455e-07	0.0150232	0.902668	15.8277	0.000123435	1.59443e-05	0.996821	80.0148	8.92758e-15	29.7594	2.96009e-07	0.114049	0.736208	24.3675	2.79688e-06	14.051	0.000283155	0.326769	0.568713	3.9833	0.0483805	0.86218	0.355126	1.09078	0.298547	2.55511	0.112756	20.8106	1.30461e-05	14.6681	0.000211815	5.60261e-06	0.998116	4.9215	0.0285414
Endophyte (E)	1	5.614	0.02	40.5818	4.30576e-09	6.46574	0.0118589	0.248063	0.619419	0.375581	0.54122	0.00719562	0.93255	2.0814	0.151894	0.0300031	0.862796	9.73117	0.0023039	5.92132	0.016526	29.3886	3.44344e-07	2.48785	0.117549	1.94943	0.16541	0.00217155	0.962915	0.0566944	0.812234	8.3043	0.00474177	1.84189	0.177458	8.30019	0.00475175	1.94725	0.165644	0.0276986	0.868119	42.5925	2.03439e-09
S*H	3	6.661	0.011	11.0145	0.00122018	35.8726	1.15747e-08	0.99006	0.321873	0.000203126	0.988654	0.000968653	0.975227	0.0285998	0.866011	0.224829	0.636308	0.00969571	0.921738	7.86428	0.00593705	2.74291	0.100486	0.744981	0.389914	1.19136	0.277397	21.7176	8.76723e-06	1.86677	0.174582	37.2226	1.54366e-08	1.66574	0.199488	1.80573	0.181738	0.406665	0.524969	0.287514	0.592882	0.378356	0.539732
S*SP	3	0.716	0.399	0.915564	0.340703	0.249032	0.618381	2.4741	0.118557	0.0409584	0.839985	1.14102	0.287733	0.631807	0.428374	4.47602	0.0365897	0.13302	0.716009	0.380012	0.538837	9.29944	0.00286115	7.52493	0.00708748	61.4806	2.83851e-12	3.02467	0.0847547	3.25549	0.0738722	27.4951	7.50876e-07	1.18643	0.278389	0.0100273	0.920415	3.58209	0.0609872	19.3018	2.54619e-05	0.555169	0.457774
S*E	3	0.35085	0.554826	2.59852	0.109778	0.128037	0.720905	0.454996	0.501362	0.0211333	0.884678	0.288077	0.59252	0.0169278	0.896715	28.5824	4.79198e-07	13.6712	0.000338891	1.8176	0.180295	1.1332	0.289383	1.13059	0.289938	0.313244	0.576814	3.10761	0.080655	18.4555	3.721e-05	0.420295	0.518117	7.93815	0.00572309	0.468422	0.495128	3.55525	0.0619482	5.90662	0.0166717	0.834207	0.363021
H*SP	1	0.114563	0.735641	3.12284	0.0799257	0.322463	0.570855	0.07484	0.78492	0.200274	0.655364	0.724086	0.396623	0.136871	0.71211	19.471	2.36115e-05	0.169795	0.681082	0.204242	0.652184	2.80877	0.0965397	0.00718236	0.932612	4.3157	0.0400487	1.1934	0.27699	0.19706	0.657961	3.64588	0.0587666	0.714866	0.399636	6.05426	0.0153998	0.551757	0.459156	0.598639	0.440728	4.27525	0.0409752
H*E	1	1.03107	0.312096	1.60575	0.207719	4.73832	0.0308296	2.93648	0.0893657	0.826813	0.365148	0.643245	0.424237	1.04296	0.309336	21.322	1.04223e-05	18.6036	3.48121e-05	2.61824	0.108429	11.3164	0.00105247	0.312516	0.577257	0.0915098	0.762828	0.5368	0.465293	3.30425	0.0717741	16.1521	0.000106261	0.0285782	0.866061	0.165026	0.685346	1.47299	0.227427	2.3918	0.124794	5.18258	0.0247147
SP*E	1	5.41491	0.0217632	12.3092	0.000649991	25.442	1.12793e-06	1.61495	0.206431	0.0150232	0.902668	0.0092556	0.923529	0.354339	0.552868	0.799901	0.373041	4.73639	0.031631	1.07055	0.30303	0.424025	0.516269	0.780446	0.378897	1.85778	0.175615	4.09997	0.0452625	2.11648	0.148518	2.59617	0.109937	2.10797	0.149329	1.81751	0.18033	0.282274	0.596267	13.2507	0.000413899	0.00489936	0.944322
S*H*SP	3	1.83301	0.178498	8.64075	0.00399344	0.205128	0.651171	0.00140078	0.970211	0.745953	0.389606	0.0898832	0.764881	0.770839	0.381837	1.25953	0.264141	1.81975	0.180064	4.83877	0.0298625	2.26447	0.135186	0.164095	0.686187	1.14822	0.286227	31.0624	1.74573e-07	0.939249	0.334559	4.00181	0.0478709	0.370843	0.543778	1.10649	0.295111	0.750607	0.388136	0.197794	0.657366	5.33859	0.0226896
S*H*E	3	4.12428	0.0446404	6.12077	0.0148603	3.87917	0.0504581	1.14733	0.286412	1.22949	0.269881	0.872192	0.352358	0.0199507	0.887929	1.51294	0.221269	0.675077	0.413033	1.33455	0.250435	3.77648	0.0544874	1.98982	0.161131	0.0166905	0.897438	2.62051	0.108303	0.688745	0.408357	10.419	0.00163634	2.89569	0.0915912	0.005971	0.938545	7.83231	0.00604428	0.104667	0.746903	1.72517	0.191713
S*SP*E	3	2.451	0.12	1.124	0.291	9.02424	0.00305281	2.98278	0.0869116	0.0150232	0.902668	2.00706	0.159344	0.000438377	0.983333	0.650653	0.421589	0.178541	0.67344	3.3	0.072	4.753	0.031	0.023	0.627	15.382	0	0.01	0.921	4.129	0.045	0.131	0.718	2.3479	0.128272	0.0363621	0.849115	0.135912	0.713075	2.07004	0.153006	0.796038	0.374193
H*SP*E	1	1.50543	0.22241	0.882867	0.34944	0.0310065	0.860428	1.32838	0.251548	0.190199	0.66359	0.369055	0.54475	0.441027	0.507992	29.2316	3.67169e-07	12.5876	0.000568459	0.71203	0.400553	1.30337	0.256034	3.09682	0.0811759	0.672688	0.413858	0.559297	0.456111	1.24134	0.267597	7.88225	0.00589046	0.125035	0.724301	5.99471	0.0159001	0.233551	0.629847	0.353627	0.553266	5.48191	0.0209827
S*H*SP*E	3	0.517325	0.473483	1.64974	0.201645	2.21458	0.138502	0.0480351	0.826917	0.152499	0.6969	0.027321	0.869013	1.66031	0.200217	0.0234993	0.878442	4.59836	0.0341643	0.259368	0.611548	1.63481	0.203682	1.9915	0.160956	2.60899	0.109073	0.600755	0.439924	3.14548	0.0788555	17.5403	5.6291e-05	0.0915364	0.762794	0.52455	0.470417	0.671904	0.414129	0.285699	0.594049	0.00106679	0.974003
